# Supplementary material
Source: HighWire-hosted journal article supplement (https://ijgc.bmj.com/content/34/2/229)

## SUPPLEMENTARY TABLES

Supplementary table 1. Search Strategy.

| Search | Query                                                                                                                                    | Results |
|--------|------------------------------------------------------------------------------------------------------------------------------------------|---------|
| #12    | Search: " <b>multiple different molecular classif*</b> " <b>endometrial</b> Sort by: <b>Publication Date</b>                             | 21      |
| #11    | Search: " <b>multiple classifier</b> " <b>endometrial</b> Sort by: <b>Publication Date</b>                                               | 2       |
| #10    | Search: " <b>multiple molecular marker*</b> " <b>endometrial</b> [Title/Abstract] Sortby: <b>Publication Date</b>                        | 1       |
| #8     | Search: (("Endometrial Neoplasms"[Mesh]) AND (multiple[Title/Abstract])) AND (classif*[Title/Abstract]) Sort by: <b>Publication Date</b> | 81      |
| #7     | Search: ("Endometrial Neoplasms/classification"[Mesh]) AND(multiple[Title/Abstract]) Sort by: <b>Publication Date</b>                    | 12      |
| #6     | Search: <b>endometrial</b> " <b>multiple classifier</b> "[Title/Abstract] Sort by: <b>Publication Date</b>                               | 2       |
| #4     | Search: " <b>Endometrial Neoplasms</b> "[Mesh] Sort by: <b>Most Recent</b>                                                               | 24,670  |
| #3     | Search: " <b>Endometrial Neoplasms/classification</b> "[Mesh] Filters: <b>in the last 10 years, English</b> Sort by: <b>Most Recent</b>  | 171     |
| #2     | Search: " <b>Endometrial Neoplasms/classification</b> "[Mesh] Filters: <b>English</b> Sort by: <b>Most Recent</b>                        | 311     |
| #1     | Search: " <b>Endometrial Neoplasms/classification</b> "[Mesh] Sort by: <b>MostRecent</b>                                                 | 354     |
| #0     | Search: <b>Clipboard</b>                                                                                                                 | 192     |

**Supplementary table 2.** Clinicopathologic and molecular characteristics of multiple classifiers.

| Molecular class | Age | Histology        | Grade            | Stage | MI   | LN          | LVISI        | Risk class          | MSI | MMR IHC   | MLH1 | PMS2 | MSH6   | MSH2   | POLE | TP53 NGS | P53 IHC   |
|-----------------|-----|------------------|------------------|-------|------|-------------|--------------|---------------------|-----|-----------|------|------|--------|--------|------|----------|-----------|
| MMRd-p53abn     | 55  | Endometrioid     | Grade 1          | IA    | None | Neg         | Absent/Focal | Low                 | MSI | MMRd      | +    | +    | -      | +      | WT   | Mut      | WT        |
| MMRd-p53abn     | 59  | Endometrioid     | Grade 1          | IA    | <50% | Neg         | Absent/Focal | Low                 | MSI | MMRd      | -    | -    | +      | +      | WT   | Mut      | Na        |
| MMRd-p53abn     | 56  | Endometrioid     | Grade 1          | IA    | <50% | Neg         | Absent/Focal | Low                 | Na  | MMRd      | +    | +    | -      | +      | WT   | Mut      | aberrant  |
| MMRd-p53abn     | 54  | Endometrioid     | Grade 1          | IA    | <50% | Neg         | Absent/Focal | Low                 | MSI | MMRd      | -    | -    | +      | +      | WT   | Mut      | Na        |
| MMRd-p53abn     | 74  | Endometrioid     | Grade 2          | IA    | <50% | Neg         | Absent/Focal | Low                 | MSI | MMRd      | -    | -    | +      | +      | WT   | Mut      | aberrant  |
| MMRd-p53abn     | 64  | Endometrioid     | Grade 2          | IA    | <50% | Neg         | Absent/Focal | Low                 | MSI | MMRd      | -    | -    | +      | +      | WT   | WT       | aberrant  |
| MMRd-p53abn     | 72  | Endometrioid     | Grade 2          | IA    | <50% | Neg         | Absent/Focal | Low                 | MSI | MMRd      | +    | +    | -      | +      | WT   | Mut      | Na        |
| MMRd-p53abn     | 69  | Clear cell       | Grade 3          | IA    | None | Neg         | Absent/Focal | Intermediate        | MSS | MMRd      | +    | +    | -      | +      | WT   | Mut      | aberrant  |
| MMRd-p53abn     | 78  | Endometrioid     | Grade 3          | IA    | None | Neg         | Absent/Focal | Intermediate        | MSI | MMRd      | +    | +    | -      | +      | WT   | Mut      | aberrant  |
| MMRd-p53abn     | 55  | Endometrioid     | Grade 3          | IA    | <50% | Neg         | Absent/Focal | Intermediate        | MSI | MMRd      | +    | +    | Patchy | -      | WT   | Mut      | aberrant  |
| MMRd-p53abn     | 55  | Endometrioid     | Grade 3          | IA    | <50% | Neg         | Absent/Focal | Intermediate        | MSI | MMRd      | +    | +    | -      | -      | WT   | Mut      | aberrant  |
| MMRd-p53abn     | 75  | Endometrioid     | Grade 3          | IA    | <50% | Neg         | Absent/Focal | Intermediate        | MSI | MMRd      | -    | -    | +      | +      | WT   | WT       | aberrant  |
| MMRd-p53abn     | 55  | Endometrioid     | Grade 3          | IA    | <50% | Neg         | Absent/Focal | Intermediate        | Na  | MMRd      | +    | +    | -      | +      | WT   | Mut      | subclonal |
| MMRd-p53abn     | 84  | Serous           | Grade 3          | IA    | None | Neg         | Absent/Focal | Intermediate        | MSI | MMRd      | +    | +    | -      | +      | WT   | Mut      | aberrant  |
| MMRd-p53abn     | 82  | Endometrioid     | Grade 2          | IB    | ≥50% | Neg         | Absent/Focal | Intermediate        | MSI | MMRd      | -    | -    | +      | +      | WT   | Mut      | WT        |
| MMRd-p53abn     | 74  | Endometrioid     | Grade 3          | IB    | ≥50% | Neg         | Diffuse      | High-intermediate   | MSI | MMRd      | +    | +    | -      | Patchy | WT   | Mut      | aberrant  |
| MMRd-p53abn     | 50  | Endometrioid     | Grade 2          | II    | <50% | Neg         | Absent/Focal | High-intermediate   | MSS | MMRd      | +    | +    | -      | +      | WT   | Mut      | aberrant  |
| MMRd-p53abn     | 55  | Endometrioid     | Grade 3          | II    | <50% | Neg         | Absent/Focal | High-intermediate   | MSI | MMRd      | -    | -    | -      | +      | WT   | Mut      | WT        |
| MMRd-p53abn     | 50  | Mixed            | Grade 3          | IA    | <50% | Neg         | Diffuse      | High                | MSI | MMRd      | +    | +    | -      | -      | WT   | Mut      | WT        |
| MMRd-p53abn     | 69  | Endometrioid     | Grade 2          | IIIA  | ≥50% | ITC         | Absent/Focal | High                | MSI | MMRd      | +    | +    | -      | -      | WT   | Mut      | Na        |
| MMRd-p53abn     | 46  | Endometrioid     | Grade 3          | IIIA  | <50% | Neg         | Absent/Focal | High                | MSI | MMRd      | +    | +    | -      | +      | WT   | Mut      | subclonal |
| MMRd-p53abn     | 50  | Endometrioid     | Grade 2          | IIIC1 | <50% | Micro/Macro | Absent/Focal | High                | MSI | MMRd      | -    | -    | +      | +      | WT   | Mut      | subclonal |
| MMRd-p53abn     | 63  | Endometrioid     | Grade 2          | IIIC1 | <50% | Micro/Macro | Diffuse      | High                | MSI | MMRd      | -    | -    | +      | +      | WT   | WT       | aberrant  |
| MMRd-p53abn     | 54  | Endometrioid     | Grade 3          | IIIC1 | ≥50% | Micro/Macro | Absent/Focal | High                | MSI | MMRd      | -    | -    | +      | +      | WT   | Mut      | Na        |
| MMRd-p53abn     | 76  | Undifferentiated | Undifferentiated | IIIC1 | ≥50% | Micro/Macro | Diffuse      | High                | MSI | MMRd      | -    | -    | +      | +      | WT   | WT       | aberrant  |
| MMRd-p53abn     | 60  | Endometrioid     | Grade 3          | IIIC2 | ≥50% | Micro/Macro | Diffuse      | High                | MSI | MMRd      | +    | +    | -      | +      | WT   | Mut      | subclonal |
| MMRd-p53abn     | 63  | Endometrioid     | Grade 3          | IVB   | ≥50% | Micro/Macro | Absent/Focal | Advanced/metastatic | MSI | MMRd      | -    | -    | +      | +      | WT   | Mut      | aberrant  |
| MMRd-p53abn     | 67  | Other            | Na               | IVB   | Na   | Na          | Na           | Advanced/metastatic | MSI | Na        | Na   | Na   | Na     | Na     | WT   | Mut      | Na        |
| POLE-P53abn     | 44  | Endometrioid     | Grade 1          | IA    | None | Neg         | Absent/Focal | Low                 | MSS | MMRp      | +    | +    | +      | +      | Mut  | Mut      | aberrant  |
| POLE-P53abn     | 54  | Endometrioid     | Grade 1          | IA    | None | Neg         | Absent/Focal | Low                 | MSS | MMRp      | +    | +    | +      | +      | Mut  | Mut      | subclonal |
| POLE-P53abn     | 59  | Endometrioid     | Grade 2          | IA    | None | Neg         | Absent/Focal | Low                 | MSS | MMRp      | +    | +    | +      | +      | Mut  | WT       | aberrant  |
| POLE-P53abn     | 57  | Endometrioid     | Grade 2          | IA    | <50% | Neg         | Absent/Focal | Low                 | MSS | Na        | Na   | Na   | Na     | Na     | Mut  | Mut      | Na        |
| POLE-P53abn     | 59  | Endometrioid     | Grade 2          | IA    | <50% | Neg         | Absent/Focal | Low                 | MSS | Equivocal | +    | +    | Patchy | +      | Mut  | Mut      | aberrant  |
| POLE-P53abn     | 44  | Endometrioid     | Grade 3          | IA    | None | Neg         | Absent/Focal | Intermediate        | Na  | MMRp      | +    | +    | +      | +      | Mut  | Mut      | WT        |
| POLE-P53abn     | 51  | Endometrioid     | Grade 3          | IA    | None | Neg         | Absent/Focal | Intermediate        | MSS | Equivocal | +    | +    | Patchy | Patchy | Mut  | Mut      | aberrant  |
| POLE-P53abn     | 79  | Endometrioid     | Grade 3          | IA    | <50% | Neg         | Absent/Focal | Intermediate        | Na  | MMRp      | +    | +    | +      | +      | Mut  | Mut      | subclonal |
| POLE-P53abn     | 57  | Endometrioid     | Grade 3          | IA    | <50% | Na          | Absent/Focal | Intermediate        | MSS | MMRp      | +    | +    | +      | +      | Mut  | Mut      | Na        |
| POLE-P53abn     | 58  | Endometrioid     | Grade 3          | IA    | <50% | Neg         | Absent/Focal | Intermediate        | MSS | MMRp      | +    | +    | +      | +      | Mut  | Mut      | subclonal |
| POLE-P53abn     | 42  | Endometrioid     | Grade 3          | IB    | ≥50% | Na          | Absent/Focal | High-intermediate   | Na  | MMRp      | +    | +    | +      | +      | Mut  | Mut      | subclonal |

|                 |    |              |         |      |      |     |              |                   |     |      |    |    |        |    |     |     |           |
|-----------------|----|--------------|---------|------|------|-----|--------------|-------------------|-----|------|----|----|--------|----|-----|-----|-----------|
| POLE-P53abn     | 75 | Endometrioid | Grade 3 | IB   | ≥50% | Neg | Absent/Focal | High-intermediate | MSS | MMRp | +  | +  | +      | +  | Mut | Mut | WT        |
| POLE-P53abn     | 44 | Endometrioid | Grade 3 | IB   | ≥50% | Neg | Absent/Focal | High-intermediate | MSS | Na   | Na | Na | Na     | Na | Mut | Mut | Na        |
| POLE-P53abn     | 59 | Clear cell   | Grade 3 | IB   | ≥50% | Neg | Diffuse      | High              | MSS | MMRp | +  | +  | +      | +  | Mut | Mut | WT        |
| POLE-P53abn     | 59 | Endometrioid | Grade 3 | IIIA | ≥50% | Neg | Absent/Focal | High              | MSS | MMRp | +  | +  | +      | +  | Mut | Mut | aberrant  |
| POLE-MMRd       | 47 | Endometrioid | Grade 1 | IA   | <50% | Neg | Absent/Focal | Low               | MSI | MMRd | +  | +  | -      | +  | Mut | WT  | Na        |
| POLE-MMRd       | 47 | Endometrioid | Grade 2 | IA   | <50% | ITC | Absent/Focal | Low               | MSS | MMRd | -  | -  | +      | +  | Mut | WT  | Na        |
| triple positive | 59 | Endometrioid | Grade 3 | IA   | <50% | Neg | Absent/Focal | Intermediate      | MSS | MMRd | +  | +  | -      | +  | Mut | Mut | subclonal |
| triple positive | 54 | Endometrioid | Grade 3 | IB   | ≥50% | Neg | Absent/Focal | High-intermediate | MSI | MMRd | -  | -  | Patchy | +  | Mut | Mut | aberrant  |
| triple positive | 51 | Mixed        | Grade 3 | IB   | ≥50% | Neg | Absent/Focal | High              | MSI | MMRd | +  | +  | -      | +  | Mut | Mut | aberrant  |

Abbreviations: Na, not available. Notes: +, normal expression (positive, present); -, loss of expression (negative, absent)

**Supplementary table 3.** Discordance between TP53 next generation sequencing and p53 immunohistochemistry.

| p53 IHC - TP53 NGS discordance |                              | Single classifier<br>N=327 | Multiple classifier<br>N=37 |
|--------------------------------|------------------------------|----------------------------|-----------------------------|
| Concordant                     | IHC normal - NGS wild type   | 235 (71.9%)                | 0 (0.0%)                    |
|                                | IHC aberrant - NGS mutated   | 60 (18.4%)                 | 25 (67.6%)                  |
| Discordant                     | IHC aberrant - NGS wild type | 28 (8.6%)                  | 5 (13.5%)                   |
|                                | IHC normal - NGS mutated     | 4 (1.2%)                   | 7 (18.9%)                   |

Abbreviations: IHC, immunohistochemistry; NGS, next-generation sequencing

**Supplementary table 4.** Discordance between microsatellite instability assay and MMR protein immunohistochemistry.

| MMR IHC - MSI assay discordance |            | Single classifier<br>N=355 | Multiple classifier<br>N=40 |
|---------------------------------|------------|----------------------------|-----------------------------|
| Concordant                      | MMRp - MSS | 260 (73.2%)                | 10 (25.0%)                  |
|                                 | MMRd - MSI | 79 (22.3%)                 | 26 (65.0%)                  |
| Discordant                      | MMRd - MSS | 11 (3.1%)                  | 4 (10.0%)                   |
|                                 | MMRp - MSI | 5 (1.4%)                   | 0 (0.0%)                    |

Abbreviations: IHC, immunohistochemistry; MMR, mismatch repair protein; MMRp, MMR proficient; MMRd, MMR deficient; MSI, microsatellite instable; MSS, microsatellite stable.

## SUPPLEMENTARY FIGURES

Supplementary figure 1. Study flow diagram.

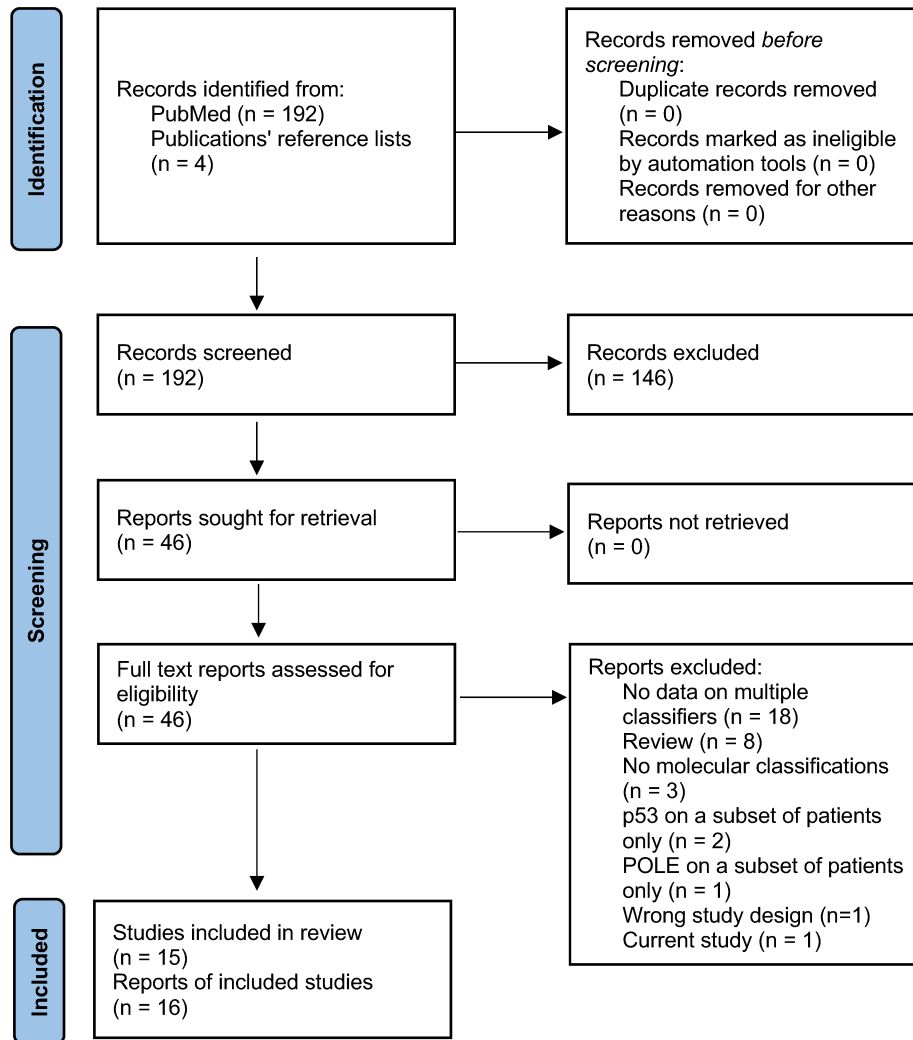

**Supplementary figure 2.** Kaplan-Meier curves of MMRd, p53abn, and MMRd-p53abn.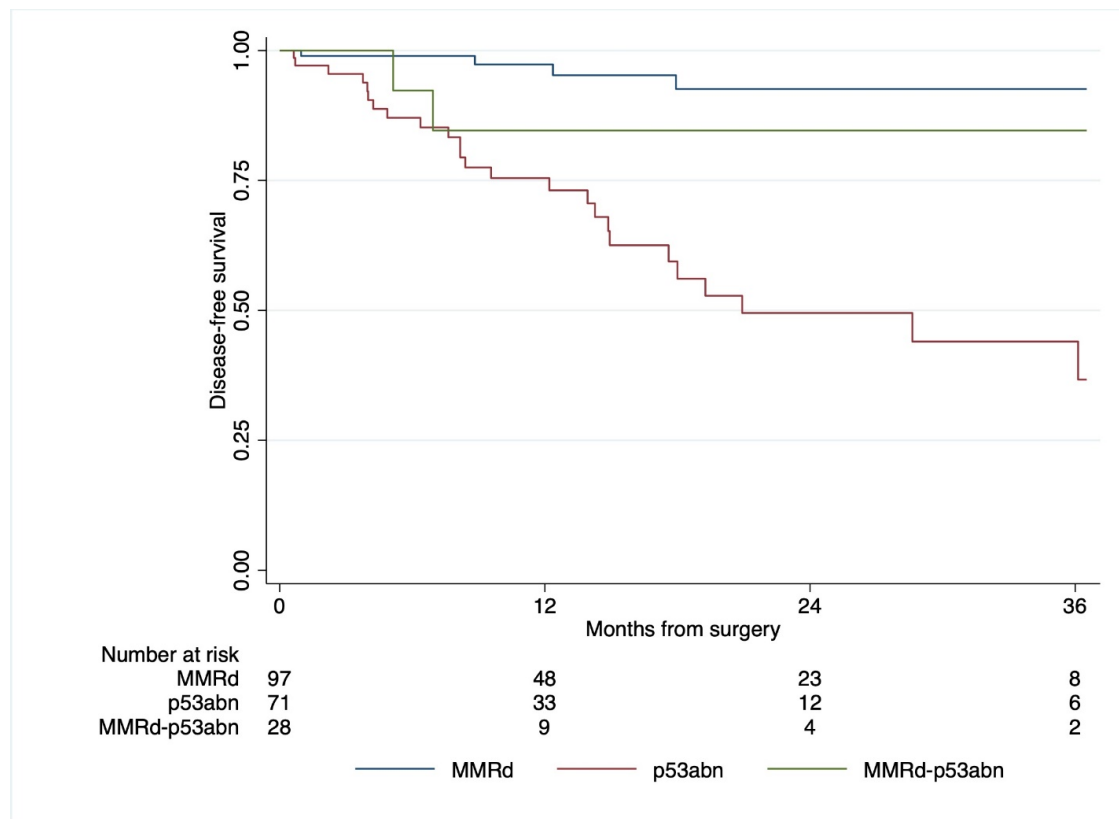

**Supplementary figure 3.** Kaplan-Meier curves of POLEmut, p53abn, and POLEmut-p53abn.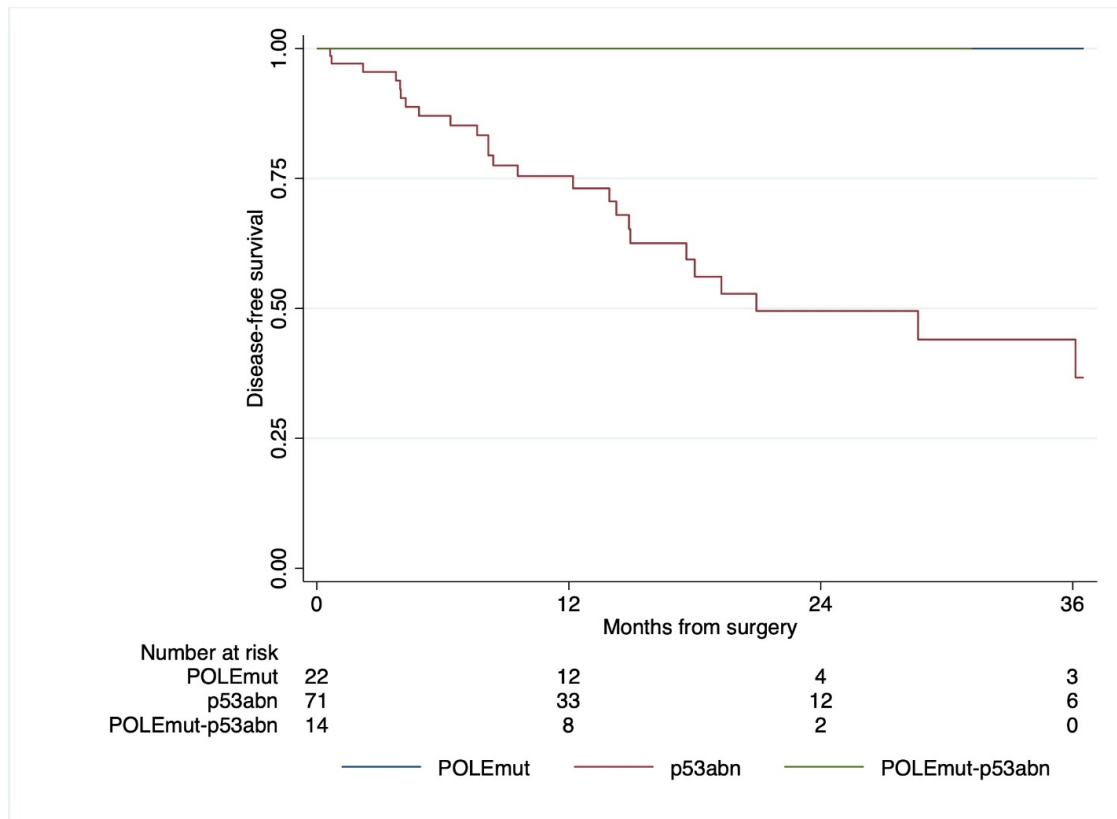

Supplement: inline-supplementary-material-1 [file inline-supplementary-material-1.pdf]
